# Supplementary material
Source: Springer Nature journal article supplement (https://www.springermedizin.de/resource/supplementary/13014_2013_1224_MOESM6_ESM.pdf/9635184)

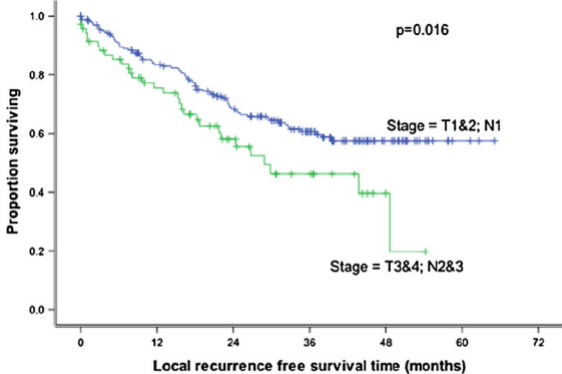

|            |     |     |     |    |    |   |     |
|------------|-----|-----|-----|----|----|---|-----|
| T1&2; N1   | 203 | 150 | 110 | 69 | 24 | 3 | 0   |
| T3&4; N2&3 | 70  | 43  | 23  | 12 | 2  | 0 | --- |

Supplement: MOESM6 [file 9635184]
